# Supplementary material for: Metabolomic Signatures Linking Depressive Symptoms to Atherosclerotic Cardiovascular Disease Comorbidity: Evidence from the UK Biobank
Source: Research Square preprint supplement (doi:10.21203/rs.3.rs-6422455/v1), 2025-07-28
Supplement: Supplementary file 1 [file 114c7e36f6d8e26ae96f3f3f.docx]

**Supplemental Online Content**

**Metabolomic Signatures Linking Depressive Symptoms to Atherosclerotic Cardiovascular Disease Comorbidity: Evidence from the UK Biobank**

Angela Koloi1,2,3, Kevin Dobretz4,5, Dafne Broquetas Damman3, Rick Quax6, Dimitris Zaridis1,7,8 Costas Papaloukas1,2,8, Dimitrios I. Fotiadis1,8 and Jos A. Bosch3,9

1Unit of Medical Technology and Intelligent Information Systems, Department of Materials Science and Engineering, University of Ioannina.

2Department of Biological Applications and Technology, University of Ioannina.

3Department of Clinical Psychology, University of Amsterdam.

4Cardiology Department, Geneva University Hospitals.

5Department of Medicine, University of Geneva.

6Computational Science Lab, Institute of Informatics, University of Amsterdam.

7Biomedical Engineering Laboratory, School of Electrical & Computer Engineering, National Technical University of Athens, 9 Iroon Polytechniou St., 15780 Athens, Greece.

8Biomedical Research Institute, Foundation for Research and Technology - Hellas (FORTH).

9Department of Medical Psychology, Amsterdam University Medical Centre.

Correspondence should be addressed to [a.koloi@uva.nl](mailto:a.koloi@uva.nl)**,** Von Zesenstraat 453, 1093 DM Amsterdam, The Netherlands.

This document contributes as supplemental information regarding the work “Metabolomic signatures linking depressive symptoms to cardiovascular disease comorbidity”. This document includes Supplemental Figures and Supplemental Tables.

# **Tables**

**Supplementary Table 1.**

*Individual symptoms of depression in UK Biobank*

| Symptoms | Instrument | Item | Coding |
| --- | --- | --- | --- |
| Anhedonia | PHQ-9 | Recent lack of interest or pleasure in doing things | Range 0-3, ≥1 Endorsed |
| Depressed mood | Recent feelings of depression | Range 0-3, ≥1 Endorsed |
| Sleep problems | Trouble sleeping, or sleeping too much | Range 0-3, ≥1 Endorsed |
| Fatigue | Recent feelings of tiredness or low energy | Range 0-3, ≥1 Endorsed |
| Appetite changes | Recent poor appetite or overeating | Range 0-3, ≥1 Endorsed |
| Feelings of inadequacy | Recent feelings of inadequacy | Range 0-3, ≥1 Endorsed |
| Cognitive problems | Recent trouble concentration | Range 0-3, ≥1 Endorsed |
| Psychomotor changes | Recent changes in moving/speaking | Range 0-3, ≥1 Endorsed |
| Suicidal ideation | Recent thoughts of suicide or self-harm | Range 0-3, ≥1 Endorsed |

**Supplementary Table 2.**

*UK Biobank ICD-10 codes for cardiovascular disease endpoints included in analysis: code definitions and categories.*

| **ICD-10** | **Meaning** | **Category** |
| --- | --- | --- |
| G463 | Brain stem stroke syndrome | G46 Vascular syndromes of brain in cerebrovascular diseases |
| G464 | Cerebellar stroke syndrome |
| I200 | Unstable angina | I20 Angina pectoris |
| I201 | Angina pectoris with documented spasm |
| I208 | Other forms of angina pectoris |
| I209 | Angina pectoris, unspecified |
| I210 | Acute transmural myocardial infarction of anterior wall | I21 Acute myocardial infarction |
| I211 | Acute transmural myocardial infarction of inferior wall |
| I212 | Acute transmural myocardial infarction of other sites |
| I213 | Acute transmural myocardial infarction of unspecified site |
| I214 | Acute subendocardial myocardial infarction |
| I219 | Acute myocardial infarction, unspecified |
| I220 | Subsequent myocardial infarction of anterior wall | I22 Subsequent myocardial infarction |
| I221 | Subsequent myocardial infarction of inferior wall |
| I228 | Subsequent myocardial infarction of other sites |
| I229 | Subsequent myocardial infarction of unspecified site |
| I230 | Haemopericardium as current complication following acute myocardial infarction | I23 Certain current complications following acute myocardial infarction |
| I231 | Atrial septal defect as current complication following acute myocardial infarction |
| I232 | Ventricular septal defect as current complication following acute myocardial infarction |
| I233 | Rupture of cardiac wall without haemopericardium as current complication following acute myocardial infarction |
| I234 | Rupture of chordae tendineae as current complication following acute myocardial infarction |
| I235 | Rupture of papillary muscle as current complication following acute myocardial infarction |
| I236 | Thrombosis of atrium, auricular appendage, and ventricle as current complications following acute myocardial infarction |
| I238 | Other current complications following acute myocardial infarction |
| I240 | Coronary thrombosis not resulting in myocardial infarction | I24 Other acute ischaemic heart diseases |
| I248 | Other forms of acute ischaemic heart disease |
| I249 | Acute ischaemic heart disease, unspecified |
| I252 | Old myocardial infarction | I25 Chronic ischaemic heart disease |
| I255 | Ischaemic cardiomyopathy |
| I258 | Other forms of chronic ischaemic heart disease |
| I259 | Chronic ischaemic heart disease, unspecified |
| I630 | Cerebral infarction due to thrombosis of precerebral arteries | I63 Cerebral infarction |
| I632 | Cerebral infarction due to unspecified occlusion or stenosis of precerebral arteries |
| I633 | Cerebral infarction due to thrombosis of cerebral arteries |
| I635 | Cerebral infarction due to unspecified occlusion or stenosis of cerebral arteries |
| I700 | Atherosclerosis of aorta | I70 Atherosclerosis |
| I7000 | Atherosclerosis of aorta (without gangrene) |
| I7001 | Atherosclerosis of aorta (with gangrene) |
| I701 | Atherosclerosis of renal artery |
| I7010 | Atherosclerosis of renal artery (without gangrene) |
| I7011 | Atherosclerosis of renal artery (with gangrene) |
| I702 | Atherosclerosis of arteries of the extremities |
| I7020 | Atherosclerosis of arteries of extremities (without gangrene) |
| I7021 | Atherosclerosis of arteries of extremities (with gangrene) |
| I708 | Atherosclerosis of other arteries |
| I7080 | Atherosclerosis of other arteries (without gangrene) |
| I7081 | Atherosclerosis of other arteries (with gangrene) |
| I709 | Generalised and unspecified atherosclerosis |
| I7090 | Generalized and unspecified atherosclerosis (without gangrene) |
| I7091 | Generalized and unspecified atherosclerosis (with gangrene) |
| Z951 | Presence of aortocoronary bypass graft | Z95 Presence of cardiac and vascular implants and grafts |
| Z955 | Presence of coronary angioplasty implant and graft |

**Supplementary Table 3.**

*Antidepressants use in UK Biobank.*

| **Class** | **UKB Coding** | **Generic Name** | **Brand Name(s)** |
| --- | --- | --- | --- |
| Tricyclic Antidepressants (TCAs) | 1140879616 | Amitriptyline | - |
| 1140879620 | Clomipramine | Anafranil |
| 1140879628 | Dothiepin | - |
| 1140909806 | Dosulepin | Prothiaden |
| 1140879630 | Imipramine | - |
| 1140867726 | Lofepramine | - |
| 1140867818 | Nortriptyline | Allegron |
| 1140867756 | Trimipramine | Surmontil |
| 1140867640 | Doxepin | Sinequan |
| 1140867948 | Amitriptyline + Perphenazine | Triptafen |
| 1140867624 | Dosulepin | Prothiaden 25mg capsule |
| 1140867690 | Clomipramine | Anafranil 10mg capsule |
| 1140867820 | Nortriptyline | Allegron 10mg tablet |
| 1140867668 | Amitriptyline | Tryptizol 10mg tablet |
| 1140867938 | Amitriptyline + Chlordiazepoxide | - |
| 1140867940 | Fluphenazine + Nortriptyline | - |
| Selective Serotonin Reuptake Inhibitors (SSRIs) | 1140921600 | Citalopram | Cipramil |
| 1141180212 | Escitalopram | Cipralex |
| 1140879540 | Fluoxetine | Prozac |
| 1140879544 | Fluvoxamine | Faverin |
| 1140867888 | Paroxetine | Seroxat |
| 1140867878 | Sertraline | Lustral |
| 1140867876 | Fluoxetine | Prozac 20mg capsule |
| 1140882236 | Paroxetine | Seroxat 20mg tablet |
| 1141190158 | Escitalopram | Cipralex 5mg tablet |
| 1141151946 | Citalopram | Cipramil 10mg tablet |
| 1140867884 | Sertraline | Lustral 50mg tablet |
| 1140867860 | Fluvoxamine | Faverin 50mg tablet |
| Serotonin-Norepinephrine Reuptake Inhibitors (SNRIs) | 1141200564 | Duloxetine | Cymbalta |
| 1140916282 | Venlafaxine | - |
| 1141201834 | Duloxetine | Cymbalta 30mg gastro-resistant capsule |
| 1141200570 | Duloxetine | Yentreve 20mg gastro-resistant capsule |
| Noradrenergic and Specific Serotonergic Antidepressants (NaSSAs) | 1141152732 | Mirtazapine | Zispin |
| 1140879556 | Mianserin | - |
| 1141152736 | Mirtazapine | Zispin 30mg tablet |
| Monoamine Oxidase Inhibitors (MAOIs) | 1140867850 | Phenelzine | Nardil |
| 1140867914 | Tranylcypromine | - |
| 1140867856 | Isocarboxazid | - |
| 1140867920 | Moclobemide | Manerix |
| 1140910820 | Tranylcypromine | MAOI - Tranylcypromine |
| 1140867852 | Phenelzine | Nardil 15mg tablet |
| 1140867922 | Moclobemide | Manerix 150mg tablet |
| 1140867944 | Tranylcypromine + Trifluoperazine | - |
| Other Antidepressants | 1140879634 | Trazodone | Molipaxin |
| 1141151978 | Reboxetine | Edronax |
| 1140917460 | Nefazodone | - |
| 1140882244 | Trazodone | Molipaxin 50mg capsule |
| 1141151982 | Reboxetine | Edronax 4mg tablet |
| 1140882312 | Doxepin | Sinequan 10mg capsule |
| 1140867784 | Maprotiline | Ludiomil 10mg tablet |
| 1140867812 | Mianserin | Norval 10mg tablet |

**Supplementary Table 4.**

*The NMR metabolites and C-reactive protein (CRP) measured in the UK Biobank, their respective groupings, and associated units.*

| **Category** | **Biomarker** | **Units** |
| --- | --- | --- |
| **NMR-Measured Metabolites** |  |  |
| Amino acids | Alanine | mmol/L |
| Glutamine | mmol/L |
| Histidine | mmol/L |
| Isoleucine | mmol/L |
| Leucine | mmol/L |
| Phenylalanine | mmol/L |
| Tyrosine | mmol/L |
| Valine | mmol/L |
| Apolipoproteins | Apolipoprotein A1 | g/L |
| Apolipoprotein B | g/L |
| Cholesterol | Total Esterified Cholesterol | mmol/L |
| Total Free Cholesterol | mmol/L |
| HDL Cholesterol | mmol/L |
| LDL Cholesterol | mmol/L |
| Remnant Cholesterol | mmol/L |
| Total Cholesterol | mmol/L |
| VLDL Cholesterol | mmol/L |
| Fatty acids | Docosahexaenoic Acid | mmol/L |
| Linoleic Acid | mmol/L |
| Monounsaturated Fatty Acids | mmol/L |
| Omega-3 Fatty Acids | mmol/L |
| Omega-6 Fatty Acids | mmol/L |
| Polyunsaturated Fatty Acids | mmol/L |
| Saturated Fatty Acids | mmol/L |
| Fluid balance | Albumin | g/L |
| Creatinine | µmol/L |
| Glycerides and phospholipids | Phosphatidylcholines | mmol/L |
| Total Triglycerides | mmol/L |
| Total Cholines | mmol/L |
| Sphingomyelins | mmol/L |
| Phosphoglycerides | mmol/L |
| Triglycerides in HDL | mmol/L |
| Triglycerides in LDL | mmol/L |
| Triglycerides in VLDL | mmol/L |
| Glycolysis related metabolites | Citrate | mmol/L |
| Glucose | mmol/L |
| Lactate | mmol/L |
| Inflammation | Glycoprotein Acetyls | mmol/L |
| Ketone bodies | 3-Hydroxybutyrate | mmol/L |
| Acetate | mmol/L |
| Acetoacetate | mmol/L |
| Lipoprotein particle size | Average Diameter for HDL Particles | nm |
| Average Diameter for LDL Particles | nm |
| Average Diameter for VLDL Particles | nm |
| Total fatty acids and saturation measures | Degree of Unsaturation | Ratio |
| Total Fatty Acids | mmol/L |
| **Particle-enhanced immunoturbidimetric assay** |  |  |
| Inflammation | CRP | mg/L |

**Supplementary Table 5.**

*Descriptive statistics in UK Biobank (PHQ-9 assessment).*

|  | **UK Biobank** | | | |  |
| --- | --- | --- | --- | --- | --- |
| **Characteristics** | ***PHQ-9*** | | | | ***Missing, %*** |
|  | **not at all** *(%)* | **several days** *(%)* | **more than half the days** *(%)* | **nearly every day** *(%)* |  |
|  |  |  |  |  |  |
| Anhedonia | 81.03 | 14.93 | 2.23 | 1.53 | 0.28 |
| Depressed mood | 77.46 | 18.84 | 1.99 | 1.34 | 0.37 |
| Sleep problems | 50.92 | 33.91 | 7.87 | 7.04 | 0.26 |
| Fatigue | 49.77 | 39.20 | 5.58 | 5.21 | 0.25 |
| Appetite changes | 81.85 | 12.81 | 2.88 | 2.30 | 0.17 |
| Feelings of inadequacy | 80.22 | 15.14 | 2.06 | 2.04 | 0.53 |
| Cognitive problems | 81.76 | 14.60 | 2.00 | 1.50 | 0.14 |
| Psychomotor changes | 94.38 | 4.06 | 0.74 | 0.59 | 0.22 |
| Suicidal ideation | 95.16 | 3.38 | 0.43 | 0.29 | 0.74 |
|  |  |  |  |  |  |

**Supplementary Table 6.**

*Detailed mediation analysis results examining the relationship between depressive symptoms and ACVD, with metabolites as mediators. Results are stratified by three covariate adjustment models: (1) age and gender, (2) age, gender, TDI, alcohol, smoking, physical activity, and antidepressant use, and (3) additional adjustment for BMI. Metrics include average causal mediation effect (ACME), average direct effect (ADE), total effect, and proportion mediated, with corresponding p-values.*

|  | | | | **Covariate Adjustments** | | | | | |
| --- | --- | --- | --- | --- | --- | --- | --- | --- | --- |
| **Age & Gender** | | **Age, Gender, TDI, Alcohol, Smoker, Physical activity & Antidepressant use** | | **Age, Gender, TDI, Alcohol, Smoker, Physical activity, Antidepressant use & BMI** | |
| **Exposure** | **Mediator** | **Outcome** | **Metrics** | **Estimate** | **P-value** | **Estimate** | **P-value** | **Estimate** | **P-value** |
| Appetite changes | CRP | CVD | ACME (control) | 0.000217 | <.001 | 0.000162 | 0.06 | 3.76E-05 | 0.18 |
| ACME (treated) | 0.000255 | <.001 | 0.000183 | 0.06 | 4.13E-05 | 0.18 |
| ADE (control) | 0.007204 | <.001 | 0.005483 | <.001 | 0.004266 | 0.06 |
| ADE (treated) | 0.007242 | <.001 | 0.005504 | <.001 | 0.00427 | 0.06 |
| Total effect | 0.00746 | <.001 | 0.005666 | <.001 | 0.004307 | 0.06 |
| Prop. mediated (control) | 0.02742 | <.001 | 0.029405 | 0.06 | 0.009203 | 0.16 |
| Prop. mediated (treated) | 0.032917 | <.001 | 0.032811 | 0.06 | 0.010246 | 0.16 |
| **ACME (average)** | **0.000231** | **<.001** | 0.000172 | 0.06 | 3.94E-05 | 0.18 |
| ADE (average) | 0.007223 | <.001 | 0.005494 | <.001 | 0.004268 | 0.06 |
| Prop. mediated (average) | 0.030181 | <.001 | 0.031208 | 0.06 | 0.00975 | 0.16 |
| **Exposure** | **Mediator** | **Outcome** | **Metrics** | **Estimate** | **P-value** | **Estimate** | **P-value** | **Estimate** | **P-value** |
| Appetite changes | Creatinine | CVD | ACME (control) | 0.000149 | <.001 | 0.000138 | <.001 | 4.2E-05 | 0.18 |
| ACME (treated) | 0.000175 | <.001 | 0.000157 | <.001 | 4.62E-05 | 0.18 |
| ADE (control) | 0.007151 | <.001 | 0.005773 | <.05 | 0.004356 | <.001 |
| ADE (treated) | 0.007177 | <.001 | 0.005792 | <.05 | 0.004361 | <.001 |
| Total effect | 0.007326 | <.001 | 0.00593 | <.001 | 0.004403 | <.001 |
| Prop. mediated (control) | 0.019302 | <.001 | 0.022161 | <.001 | 0.008675 | 0.18 |
| Prop. mediated (treated) | 0.02353 | <.001 | 0.025449 | <.001 | 0.009678 | 0.18 |
| **ACME (average)** | **0.000192** | **<.001** | **0.000143** | <.05 | 4.41E-05 | 0.18 |
| ADE (average) | 0.007164 | <.001 | 0.005782 | <.05 | 0.004359 | <.001 |
| Prop. mediated (average) | 0.021583 | <.001 | 0.023907 | <.001 | 0.009151 | 0.18 |
| **Exposure** | **Mediator** | **Outcome** | **Metrics** | **Estimate** | **P-value** | **Estimate** | **P-value** | **Estimate** | **P-value** |
| Appetite changes | Glycoprotein Acetyls | CVD | ACME (control) | 0.000891 | <.001 | 0.000613 | <.001 | 0.000236 | <.001 |
| ACME (treated) | 0.001033 | <.001 | 0.000697 | <.001 | 0.00026 | <.001 |
| ADE (control) | 0.006433 | <.001 | 0.00564 | <.001 | 0.004442 | <.05 |
| ADE (treated) | 0.006575 | <.001 | 0.005724 | <.001 | 0.004466 | <.05 |
| Total effect | 0.007466 | <.001 | 0.006337 | <.001 | 0.004702 | <.001 |
| Prop. mediated (control) | 0.121036 | <.001 | 0.095058 | <.001 | 0.048954 | <.001 |
| Prop. mediated (treated) | 0.138771 | <.001 | 0.108588 | <.001 | 0.05431 | <.001 |
| **ACME (average)** | **0.000962** | **<.001** | **0.000655** | **<.001** | **0.000248** | **<.001** |
| ADE (average) | 0.006504 | <.001 | 0.005682 | <.001 | 0.004454 | <.05 |
| Prop. mediated (average) | 0.129266 | <.001 | 0.101878 | <.001 | 0.051449 | <.001 |
| **Exposure** | **Mediator** | **Outcome** | **Metrics** | **Estimate** | **P-value** | **Estimate** | **P-value** | **Estimate** | **P-value** |
| Fatigue | Glucoprotein Acetyls | CVD | ACME (control) | 0.000411 | <.001 | 0.000282 | <.001 | 0.000153 | <.001 |
| ACME (treated) | 0.000517 | <.001 | 0.000345 | <.001 | 0.000188 | <.001 |
| ADE (control) | 0.008394 | <.001 | 0.007713 | <.001 | 0.007788 | <.001 |
| ADE (treated) | 0.0085 | <.001 | 0.007776 | <.001 | 0.007822 | <.001 |
| Total effect | 0.008911 | <.001 | 0.008058 | <.001 | 0.007975 | <.001 |
| Prop. mediated (control) | 0.044749 | <.001 | 0.034009 | <.001 | 0.018672 | <.001 |
| Prop. mediated (treated) | 0.056638 | <.001 | 0.041471 | <.001 | 0.023016 | <.001 |
| **ACME (average)** | **0.000484** | **<.001** | **0.000314** | **<.001** | **0.00016** | **<.001** |
| ADE (average) | 0.008447 | <.001 | 0.007744 | <.001 | 0.007805 | <.001 |
| Prop. mediated (average) | 0.050774 | <.001 | 0.037528 | <.001 | 0.020916 | <.001 |
| **Exposure** | **Mediator** | **Outcome** | **Metrics** | **Estimate** | **P-value** | **Estimate** | **P-value** | **Estimate** | **P-value** |
| Appetite changes | Monounsaturated Fatty Acids | CVD | ACME (control) | 0.000398 | <.001 | 0.000311 | <.001 | 8.3E-05 | <.05 |
| ACME (treated) | 0.000468 | <.001 | 0.000352 | <.001 | 9.21E-05 | <.05 |
| ADE (control) | 0.007172 | <.001 | 0.005494 | <.001 | 0.004654 | <.05 |
| ADE (treated) | 0.007242 | <.001 | 0.005535 | <.001 | 0.004663 | <.05 |
| Total effect | 0.00764 | <.001 | 0.005845 | <.001 | 0.004746 | <.05 |
| Prop. mediated (control) | 0.050325 | <.001 | 0.049969 | <.001 | 0.016561 | 0.06 |
| Prop. mediated (treated) | 0.059315 | <.001 | 0.056721 | <.001 | 0.018162 | 0.06 |
| **ACME (average)** | **0.000443** | **<.001** | **0.000321** | **<.001** | **0.000112** | **<.05** |
| ADE (average) | 0.007207 | <.001 | 0.005514 | <.001 | 0.004658 | <.05 |
| Prop. mediated (average) | 0.055182 | <.001 | 0.053408 | <.001 | 0.017323 | 0.06 |
| **Exposure** | **Mediator** | **Outcome** | **Metrics** | **Estimate** | **P-value** | **Estimate** | **P-value** | **Estimate** | **P-value** |
| Sleep problems | Monounsaturated Fatty Acids | CVD | ACME (control) | 0.000154 | <.001 | 0.000118 | <.05 | 6.15E-05 | <.05 |
| ACME (treated) | 0.000169 | <.001 | 0.000128 | <.05 | 6.65E-05 | <.05 |
| ADE (control) | 0.004153 | <.001 | 0.003897 | <.001 | 0.003529 | <.001 |
| ADE (treated) | 0.004168 | <.001 | 0.003908 | <.001 | 0.003534 | <.001 |
| Total effect | 0.004322 | <.001 | 0.004026 | <.001 | 0.003595 | <.001 |
| Prop. mediated (control) | 0.033235 | <.001 | 0.028218 | <.05 | 0.015941 | <.05 |
| Prop. mediated (treated) | 0.037111 | <.001 | 0.031044 | <.05 | 0.017329 | <.05 |
| **ACME (average)** | **0.000168** | **<.001** | **0.000123** | **<.001** | **6.4E-05** | **<.05** |
| ADE (average) | 0.00416 | <.001 | 0.003903 | <.001 | 0.003531 | <.001 |
| Prop. mediated (average) | 0.035173 | <.001 | 0.029527 | <.05 | 0.016677 | <.05 |

**Figure Legends**

**Supplementary Figure 1.**

*Distribution plots of metabolites and CRP, each color correspond to a distinct group.*

**Supplementary Figure 2**.

*Boxplots showing the distribution of metabolite concentrations (y-axis) across the study population, with individual metabolites on the x-axis. Outliers are highlighted to identify extreme values or data quality issues.*

**Supplementary Figure 3. Network stability analysis of symptom-metabolite pairs.**

***(****A) Scatter plot of symptom-metabolites connections, with stable edges (red) defined as those appearing in ≥75% of bootstrap samples. The x-axis represents the frequency of occurrence, and the y-axis shows the mean weight of each connection. (B) Visualization of stable symptom-metabolite pairs, displaying their mean weights (y-axis) and standard deviations (color-coded legend)*

**Supplementary Figure 4.**

***(****A) Scatter plot of ACVD-metabolites connections, with stable edges (red) defined as those appearing in ≥75% of bootstrap samples. The x-axis represents the frequency of occurrence, and the y-axis shows the mean weight of each connection. (B) Visualization of stable ACVD-metabolite pairs, displaying their mean weights (y-axis) and standard deviations (color-coded legend)*

**Supplementary Figure 5. Betweenness Centrality Results.**

*Nodes with significant betweenness centrality (highlighted in red) following permutation testing (p < 0.05).*

# **Figures**

**Supplementary Figure 1.**


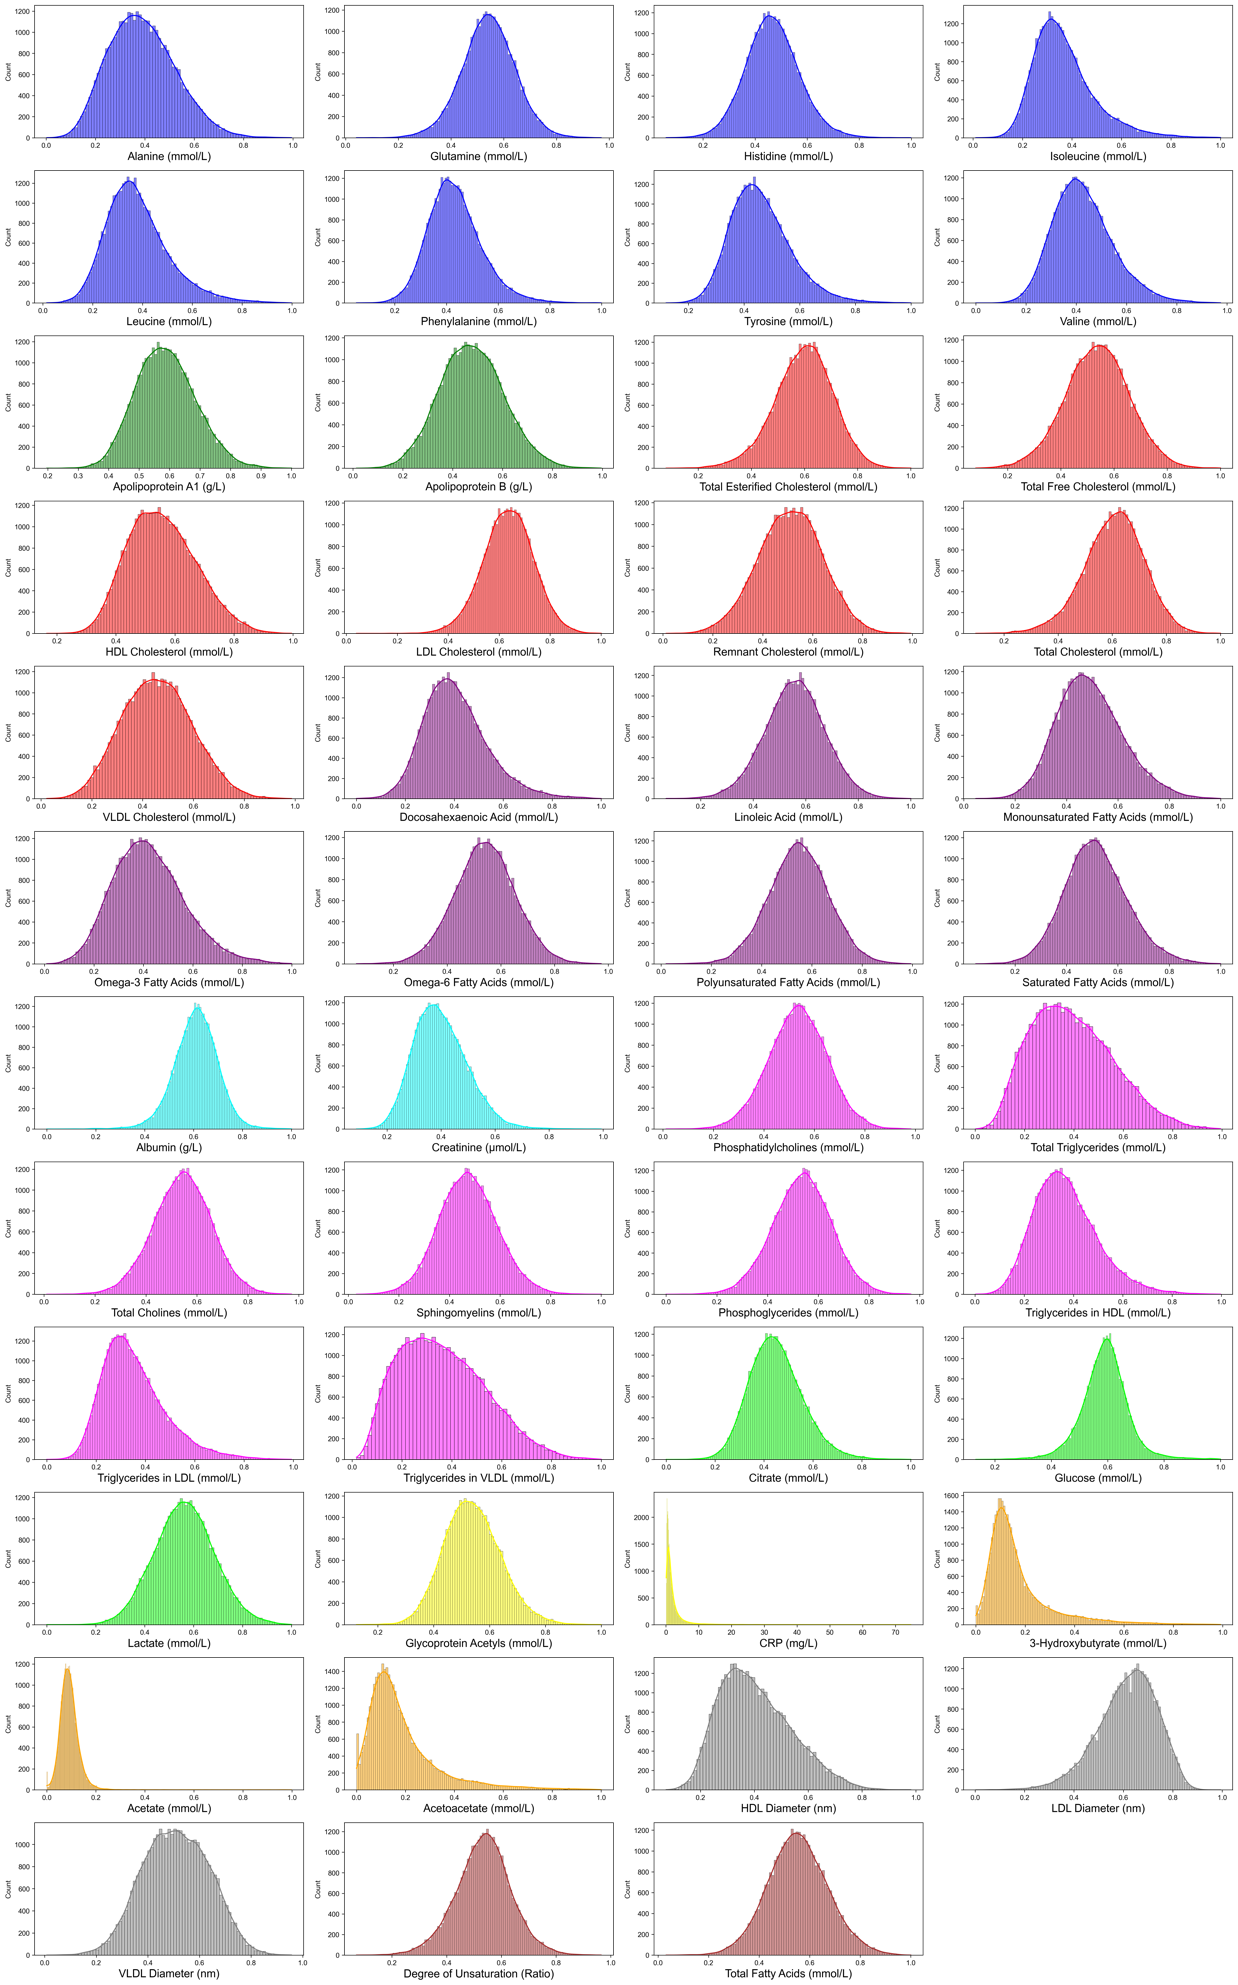


**Supplementary Figure 2**.

**
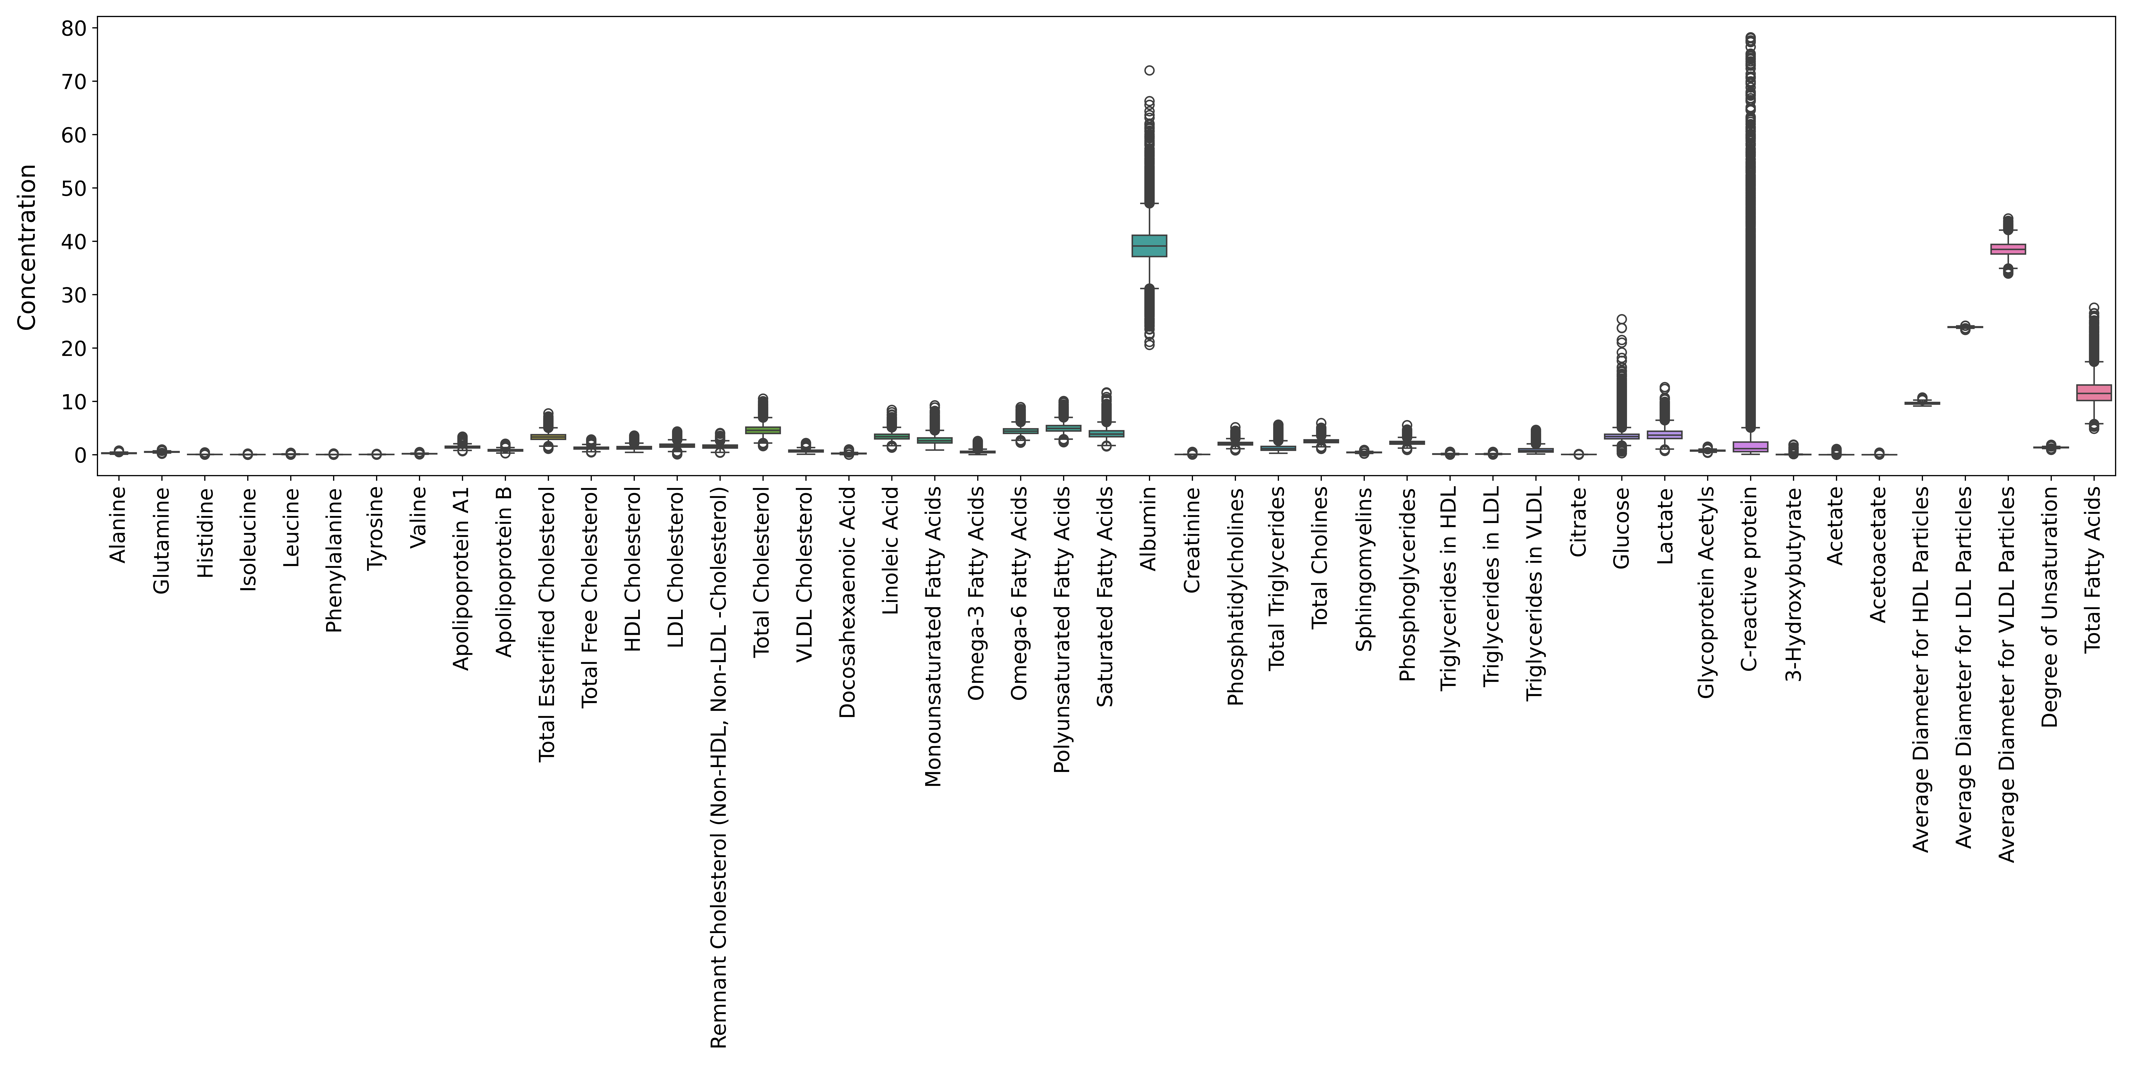
**

**Supplementary Figure 3.**
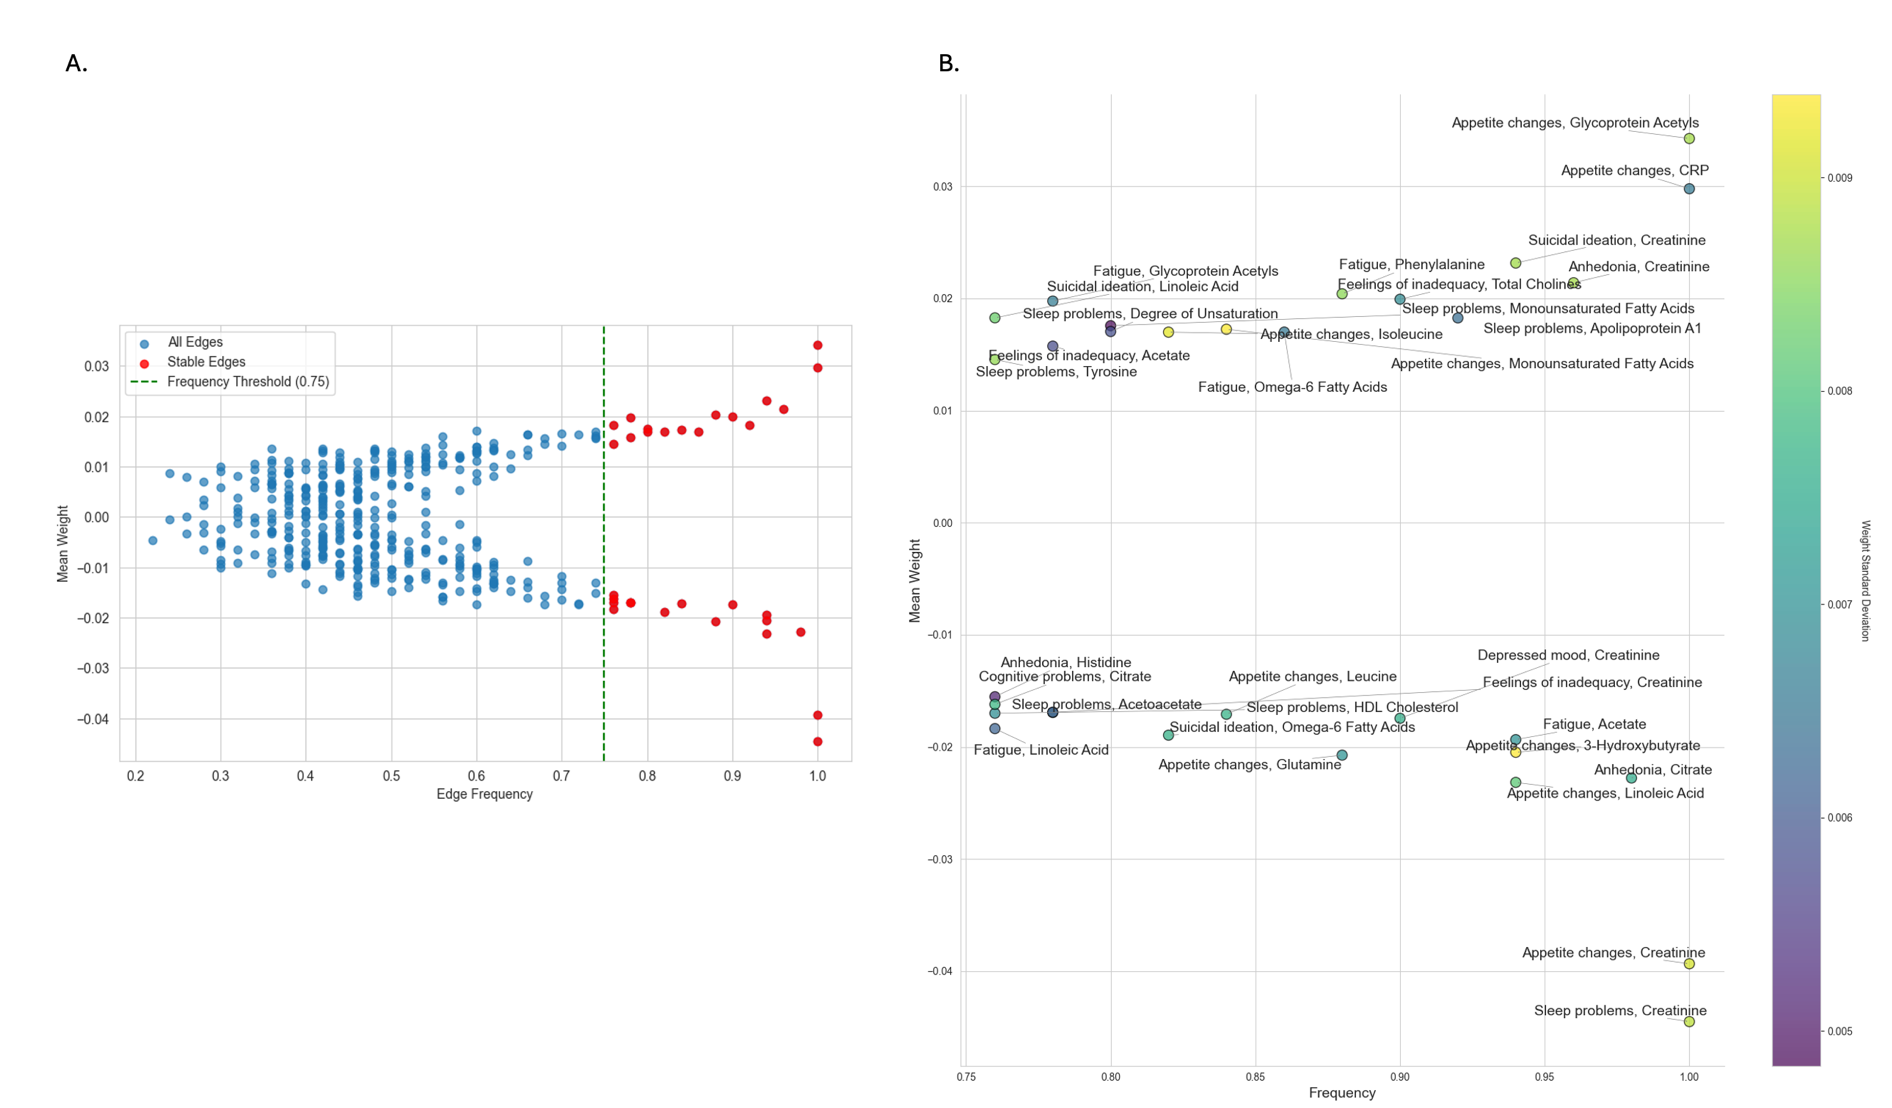


**Supplementary Figure 4.**

*.
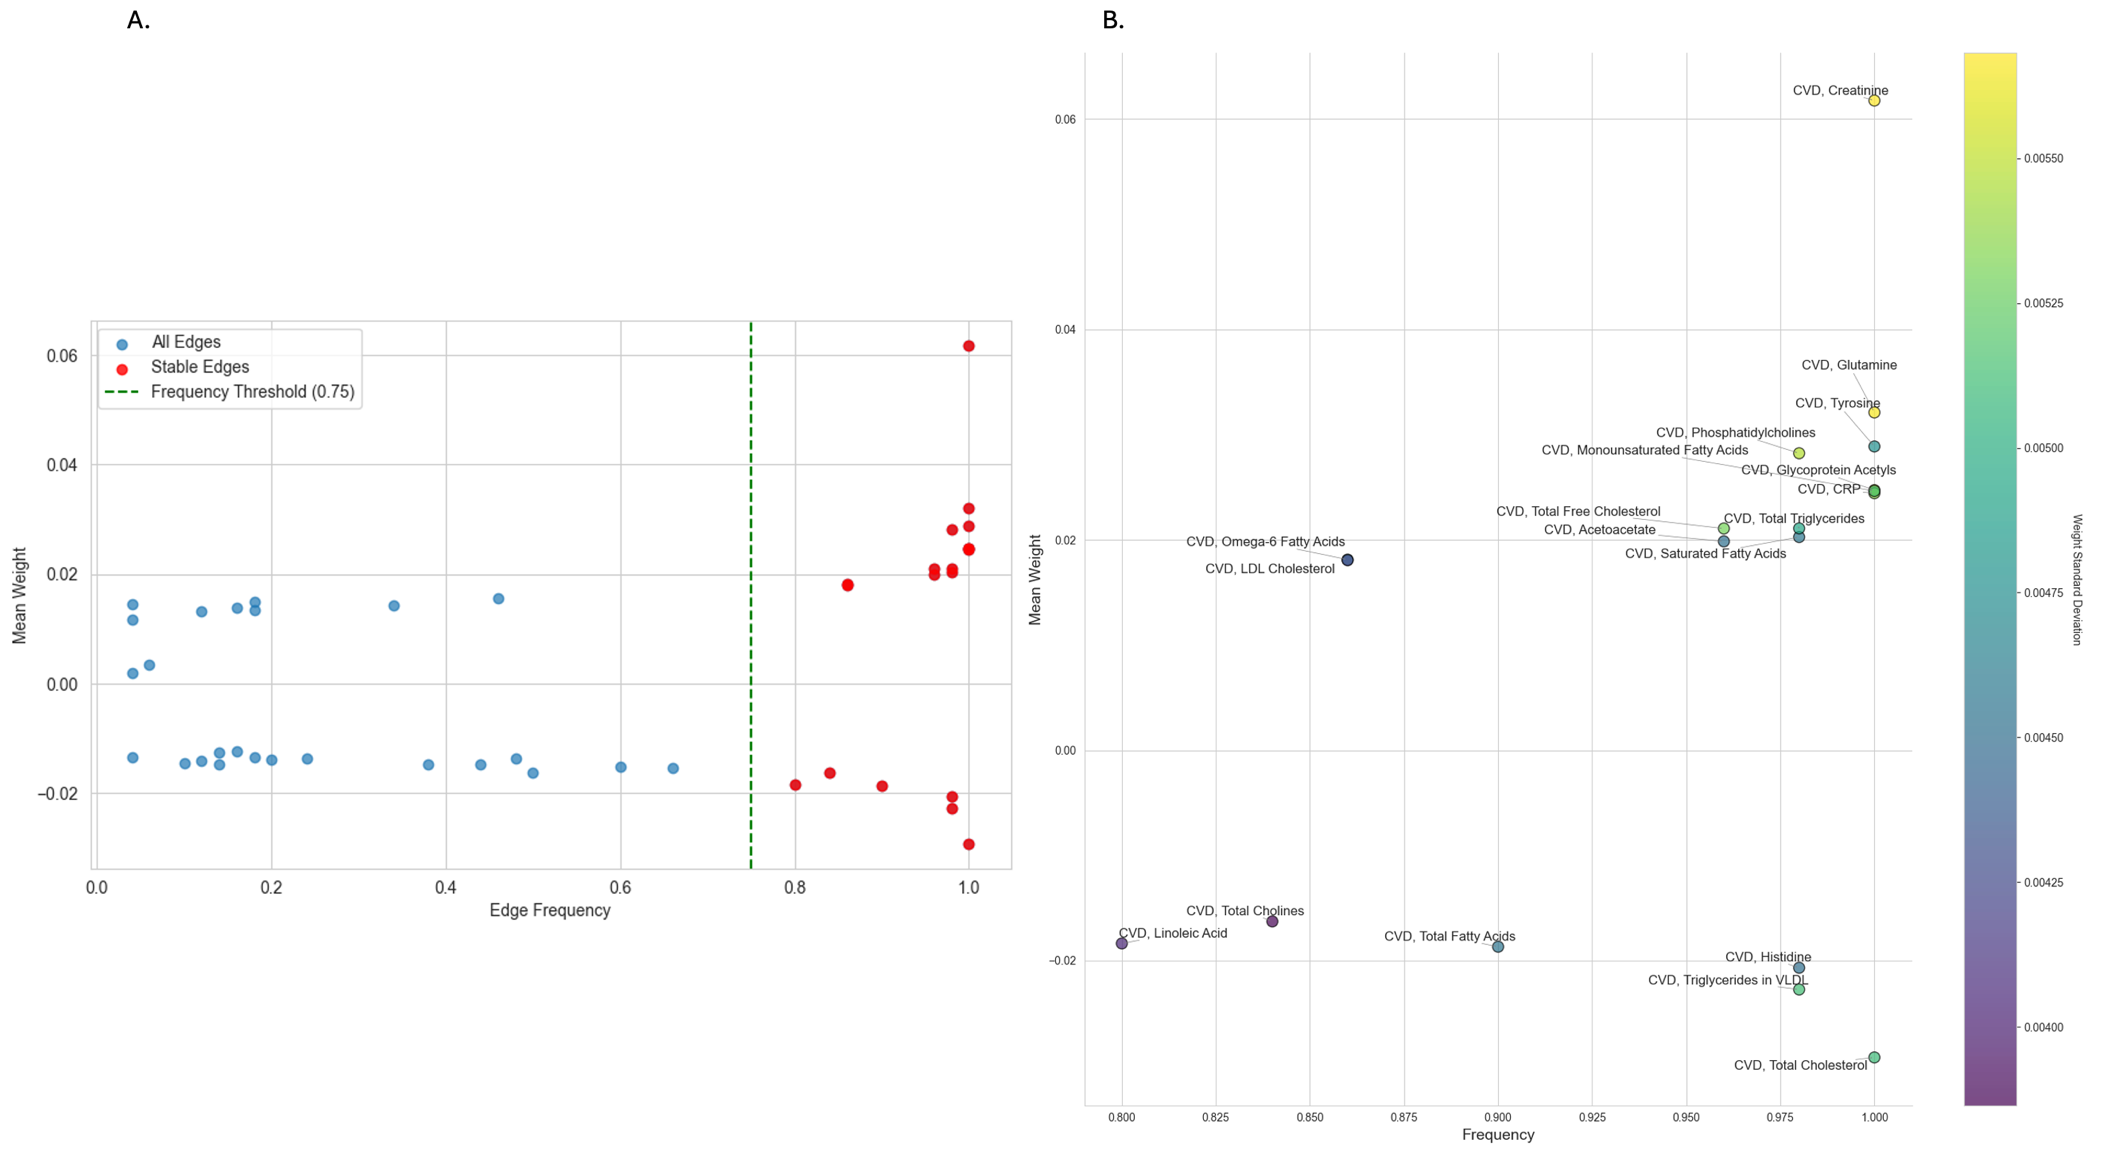
*

**Supplementary Figure 5.**

*
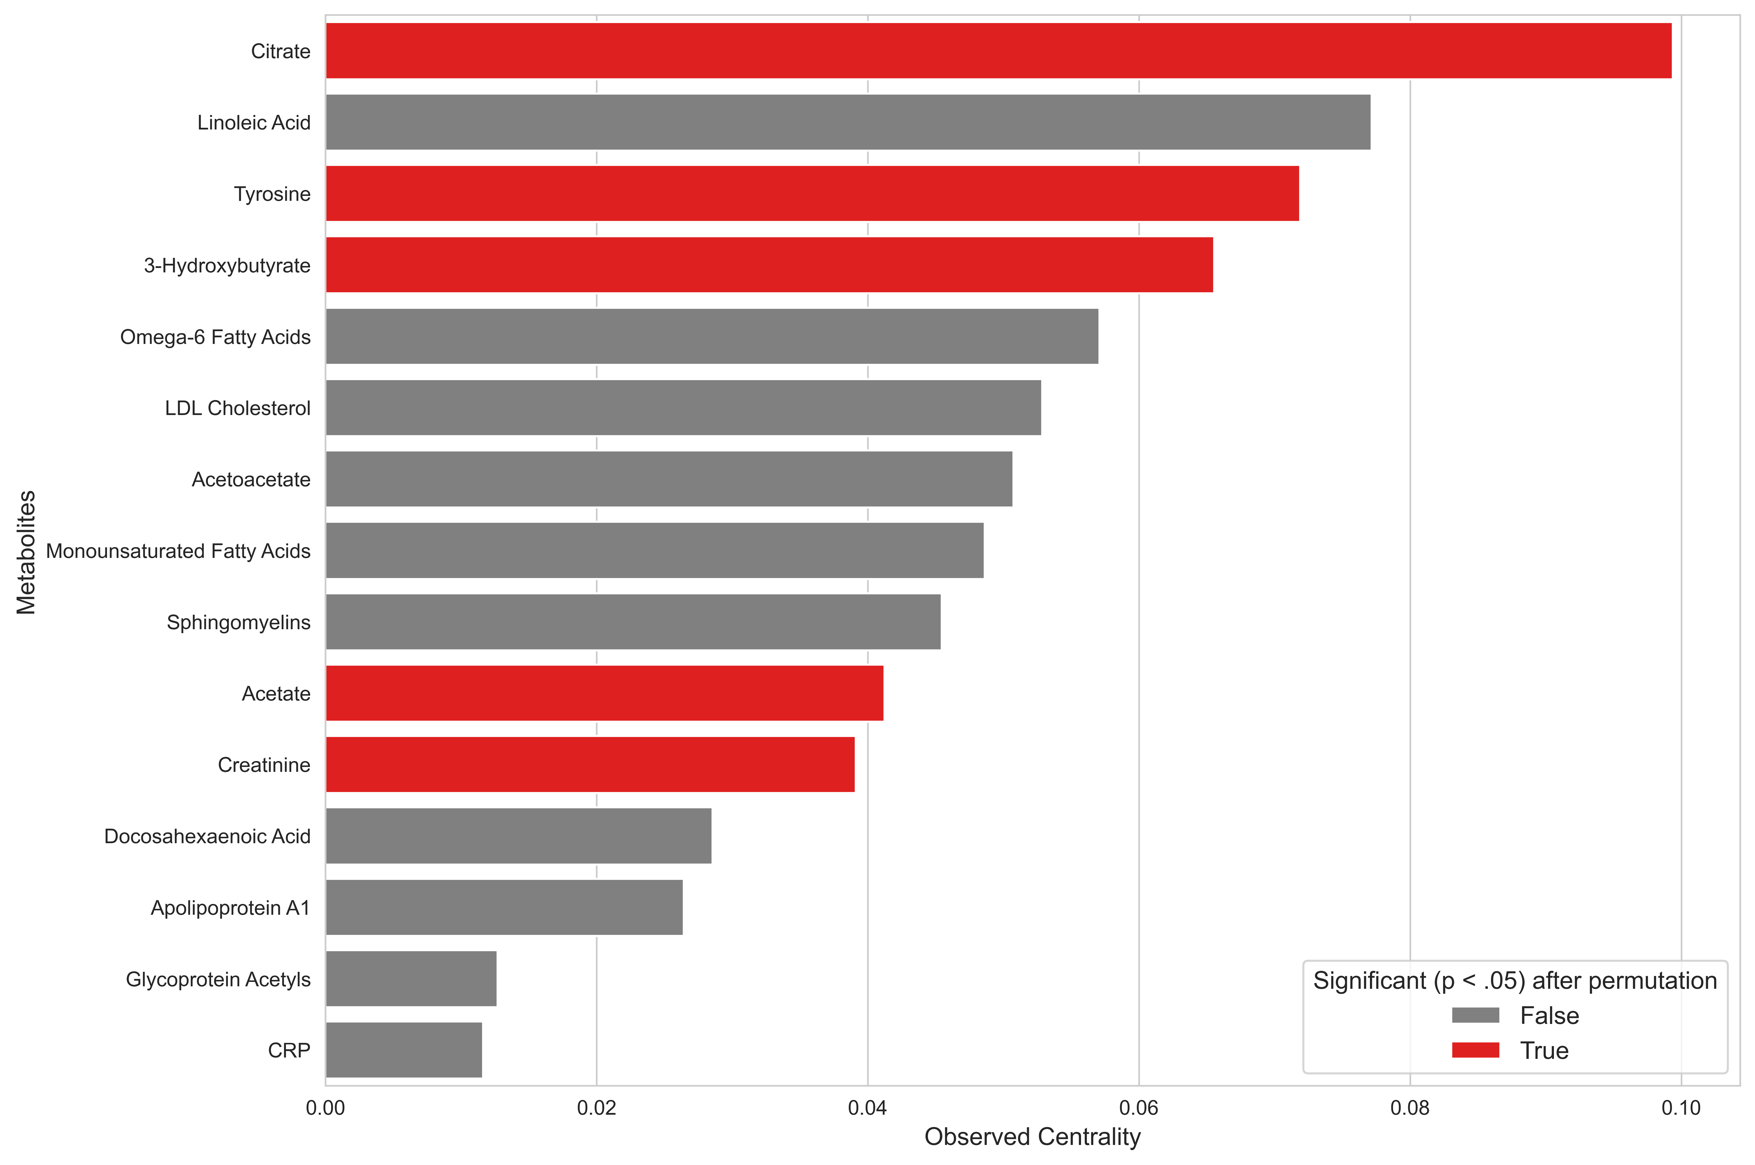
*
